# Supplementary material
Source: Springer Nature journal article supplement (https://www.springermedizin.de/resource/supplementary/12874_2010_515_MOESM4_ESM.pdf/9432412)

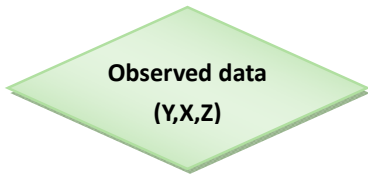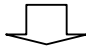

### Initialization

1. Logistic modeling of X on Z using observed data
2. Predict  $P(X=1|Z)$  for obs. with missing and adjust by ratio  $r$
3. Logistic modeling of Y on X and Z using all obs.
4. Update  $P(X=1|Y, Z)$  for missing obs. using a Bayesian formula

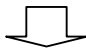

### M-Step

1. Update logistic model of X on Z
2. Predict  $P(X=1|Z)$  for obs. with missing and adjust by ratio  $r$
3. Update logistic model of Y on X and Z

### E-Step

Update  $P(X=1|Y, Z)$  using a Bayesian formula

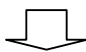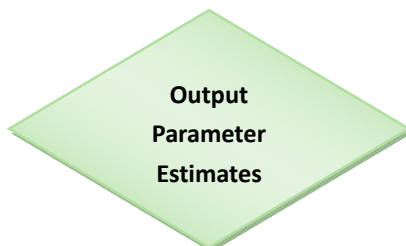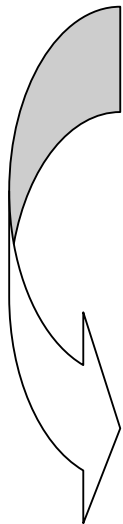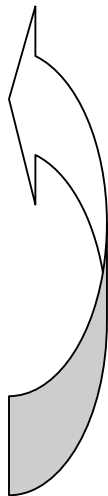

Supplement: MOESM4 [file 9432412]
